# Supplementary material
Source: publisher figshare collection journal article supplement (https://geolsoc.figshare.com/ndownloader/files/26142920)
Supplement: Supplementary file 1 [file 26142920]

| **Table S2.** *Rb-Sr isotopic compositions for the studied syenites* | | | | | | | |
| --- | --- | --- | --- | --- | --- | --- | --- |
| Samples | Rb (ppm) | Sr (ppm) | 87Sr/86Sr | Error (1σ) | 87Rb/86Sr | 87Sr/86Sr (initial) |
| AP/PVS/1 | 110 | 88 | 0.80872 | 0.00001 | 3.6537 | 0.692247 |
| AP/PVS/2 | 105 | 67 | 0.82206 | 0.00001 | 4.5866 | 0.675843 |
| SS/PVS/1 | 118 | 81 | 0.82630 | 0.00001 | 4.2653 | 0.690327 |
| AP/VDS/1 | 195 | 71 | 0.94522 | 0.00001 | 8.1339 | 0.685914 |
| AP/VDS/2 | 186 | 88 | 0.89256 | 0.00001 | 6.2282 | 0.694011 |

Initial Sr isotope ratios have been calculated for an emplacement age of ~2.21 Ga.
